# Supplementary material
Source: PubMed Central journal article supplement (PMC4133986)
Supplement: NIHMS603316-supplement-03.pdf [file NIHMS603316-supplement-03.pdf]

## Supplemental Table 2

Relative abundances of all bacterial phyla sequenced with the tested forward primers.

|                         | <i>A. constructor</i> |                 |                 |                 |                 |                 | <i>L. dispar</i> |                 |                 |                 |                 |                 |                 |                     |
|-------------------------|-----------------------|-----------------|-----------------|-----------------|-----------------|-----------------|------------------|-----------------|-----------------|-----------------|-----------------|-----------------|-----------------|---------------------|
|                         | 799F/1392R            | 799F-tags/1392R | 799F-mod2/1392R | 799F-mod3/1392R | 799F-mod6/1392R | 799F-mod7/1392R | 799F/1392R       | 799F-tags/1392R | 799F-thio/1392R | 799F-mod2/1392R | 799F-mod3/1392R | 799F-mod6/1392R | 799F-mod7/1392R | 799F-mod7thio/1392R |
| Acidobacteria           | 0                     | 0               | 0               | 0               | 0.1             | 0               | 0                | 0               | 1.6             | 0               | 0               | 0               | 0.3             | 0                   |
| Actinobacteria          | 38.1                  | 36.4            | 33.1            | 39.9            | 32.7            | 27.0            | 6.0              | 5.4             | 6.7             | 6.4             | 16.1            | 4.6             | 3.1             | 6.9                 |
| Bacteroidetes           | 1.6                   | 2.8             | 2.2             | 2.8             | 4.3             | 1.9             | 0.3              | 0.5             | 0               | 5.4             | 3.4             | 2.6             | 0.2             | 0.6                 |
| Chlamydiae              | 0                     | 0               | 0.2             | 0               | 0               | 0               | 0                | 0               | 0               | 0               | 0               | 0               | 0               | 0                   |
| Chloroflexi             | 0                     | 0               | 0.01            | 0               | 0.01            | 0               | 0                | 0               | 0               | 0               | 0               | 0               | 0               | 0                   |
| Cyanobacteria           | 0.4                   | 2.0             | 0.02            | 0               | 0               | 0               | 0.4              | 6.9             | 0               | 0.1             | 0               | 0               | 0               | 0                   |
| Deinococcus-<br>Thermus | 0                     | 0               | 0               | 0               | 0               | 0               | 0                | 0               | 0               | 0.6             | 0               | 0               | 0               | 0                   |
| Firmicutes              | 3.3                   | 2.0             | 3.1             | 2.1             | 2.6             | 2.9             | 1.2              | 1.7             | 1.6             | 1.9             | 1.0             | 0.6             | 2.2             | 2.8                 |
| Planctomycetes          | 0                     | 0.1             | 0.02            | 0               | 0.01            | 0               | 0                | 0               | 0               | 0               | 0               | 0               | 0               | 0                   |
| Proteobacteria          | 56.4                  | 56.6            | 61.2            | 55.3            | 60.0            | 68.1            | 92.1             | 85.6            | 89.8            | 85.6            | 78.9            | 90.5            | 94.2            | 89.6                |
| Verrucomicrobia         | 0.01                  | 0               | 0               | 0               | 0               | 0.06            | 0                | 0               | 0               | 0               | 0               | 0               | 0               | 0                   |
| unclassified            | 0.3                   | 0               | 0.2             | 0               | 0.2             | 0               | 0                | 0               | 0               | 0               | 0.5             | 1.5             | 0               | 0                   |
